# Supplementary material for: Correlations between Self-Reported Cooking Confidence and Creativity and Use of Convenience Cooking Products in an Australian Cohort
Source: MDPI journal article supplement (doi:10.3390/nu13051724), 2021-05-19
Supplement: s1 [file s1]

# Correlations between self-reported cooking confidence and creativity and use of convenience cooking products in an Australian cohort.

Natasha Brasington <sup>1</sup>, Patrice Jones <sup>1,2</sup>, Tamara Bucher <sup>1,3</sup> and Emma L Beckett <sup>1,2,3,\*</sup>

## Supplementary Methods

### Cooking confidence scale

|                                                                | Strongly disagree 1   | 2                     | 3                     | 4                     | Strongly agree 5      |
|----------------------------------------------------------------|-----------------------|-----------------------|-----------------------|-----------------------|-----------------------|
| I am a good cook                                               | <input type="radio"/> |
| Others view me as a good cook                                  | <input type="radio"/> |
| I am a relatively better cook than my friends/family           | <input type="radio"/> |
| I get a sense of satisfaction from preparing and cooking meals | <input type="radio"/> |
| I am confident that whatever I cook will turn out well         | <input type="radio"/> |
| Others don't consider me to be a good cook                     | <input type="radio"/> |
| I don't consider myself to be a good cook                      | <input type="radio"/> |

### Cooking creativity scale

Please indicate the extent to which you agree or disagree with the following statements.

|                                                                                          | Strongly<br>disagree 1 | 2                     | 3                     | 4                     | Strongly<br>agree 5   |
|------------------------------------------------------------------------------------------|------------------------|-----------------------|-----------------------|-----------------------|-----------------------|
| I consider myself to<br>be very creative with<br>food                                    | <input type="radio"/>  | <input type="radio"/> | <input type="radio"/> | <input type="radio"/> | <input type="radio"/> |
| I am good at coming<br>up with new and<br>different recipe ideas                         | <input type="radio"/>  | <input type="radio"/> | <input type="radio"/> | <input type="radio"/> | <input type="radio"/> |
| I dont have much of<br>an imagination about<br>things to cook                            | <input type="radio"/>  | <input type="radio"/> | <input type="radio"/> | <input type="radio"/> | <input type="radio"/> |
| People who know me<br>would say that I am<br>more creative with<br>food than most people | <input type="radio"/>  | <input type="radio"/> | <input type="radio"/> | <input type="radio"/> | <input type="radio"/> |
| I like thinking of<br>original and new<br>things to cook                                 | <input type="radio"/>  | <input type="radio"/> | <input type="radio"/> | <input type="radio"/> | <input type="radio"/> |
| I prefer to follow<br>recipes in cook books                                              | <input type="radio"/>  | <input type="radio"/> | <input type="radio"/> | <input type="radio"/> | <input type="radio"/> |
